From the Department of Internal Medicine, Niigata Prefectural Yoshida Hospital, Yoshida, Nishikanbara, Niigata, Japan.

Address correspondence to Eiji Oda, MD, Department of Internal Medicine, Niigata Prefectural Yoshida Hospital, Yoshida, Nishikanbara, Niigata, 959-0242, Japan. E-mail: ijie@venus.sannet.ne.jp.

DOI: 10.2337/dc06-0146

© 2006 by the American Diabetes Association.

## References

1. Sone H, Mizuno S, Fujii H, Yoshimura Y, Yamasaki Y, Ishibashi S, Katayama S, Saito Y, Ito H, Ohashi Y, Akanuma Y, Yamada N, the Japan Diabetes Complications Study: Is the diagnosis of metabolic syndrome useful for predicting cardiovascular disease in Asian diabetic patients? Analysis from the Japan Diabetes Complications Study. *Diabetes Care* 28:1463–1471, 2005
2. Sone H, Tanaka S, Ishibashi S, Yamasaki Y, Oikawa S, Ito H, Saito Y, Ohashi Y, Akanuma Y, Yamada N, the Japan Diabetes Complications Study Group: The new worldwide definition of metabolic syndrome is not a better diagnostic predictor of cardiovascular disease in Japanese diabetic patients than the existing definitions: additional analysis from the Japan Diabetes Complications Study. *Diabetes Care* 29:145–147, 2006
3. The Examination Committee of Criteria for “Obesity Disease” in Japan, Japan Society for the Study of Diabetes: New criteria for “Obesity Disease” in Japan. *Circ J* 66:987–992, 2002
4. Shiwaku K, Anuurad E, Enkhmaa B, Nogi A, Kitajima K, Yamasaki M, Yoneyama T, Oyunsuren T, Yamane Y: Predictive values of anthropometric measurements for multiple metabolic disorders in Asian populations. *Diabetes Res Clin Pract* 69:52–62, 2005

## Cut Points of Waist Circumference

### Response to Oda

We are grateful for Dr. Oda's comments (1) on our recent reports (2,3) regarding the utility of waist circumference cutoff values in clinical risk assessments for cardiovascular disease. We agree with his point that the current Japanese criteria for abdominal obesity (85 cm for men and 90 cm for women in waist circumference) (4) are problematical, notwithstanding their adoption by the International Diabetes

Federation (IDF) (5) and the American Heart Association (AHA) (revised version by the National Cholesterol Education Program [NCEP]) (6) in their definitions of metabolic syndrome.

We recalculated the risk of metabolic syndrome, as defined by the IDF and the NCEP, for cardiovascular events applying the Asian cutoff for waist circumference (90 cm for men and 80 cm for women) (7) and found that the hazard ratio (HR) of metabolic syndrome in female diabetic patients improved to some extent but that waist circumference alone was still not predictive for cardiovascular disease. In female patients, the HR of NCEP–metabolic syndrome for stroke improved to become significant (2.68 [95% CI 1.20–5.97]), and the HR of NCEP–metabolic syndrome and IDF–metabolic syndrome for combined cardiovascular events (either of coronary heart disease or stroke) also improved to become significant (2.02 [1.13–3.62] and 1.91 [1.07–3.42], respectively) using the Asian waist cutoff. The HRs for male patients did not change significantly under this modification. Consequently, modifying the IDF and the NCEP definitions by substituting the Japanese for the Asian cutoff value significantly improved the prognostic implications for female Japanese patients with type 2 diabetes, although it is notable that the HRs were still lower than those obtained using the World Health Organization definition (3).

An important limitation to the waist cutoff data (both Japanese [4] and Asian [7]) is that the values were determined from cross-sectional observations rather than from prospective cohort studies. Before undertaking any further discussions on the most appropriate cutoff value for waist circumference, further large-scale prospective studies are necessary to determine whether waist circumference per se is in fact a significant risk factor for cardiovascular events and/or mortality in East Asian diabetic and nondiabetic populations.

HIROHITO SONE, MD, PHD, FACP<sup>1</sup>

SACHIKO TANAKA, PHD<sup>2</sup>

YASUO OHASHI, PHD<sup>3</sup>

NOBUHIRO YAMADA, MD, PHD<sup>1</sup>

From the <sup>1</sup>Department of Internal Medicine, University of Tsukuba Institute of Clinical Medicine, Tsukuba, Japan; the <sup>2</sup>Statistics and Cancer Control Division, Research Center for Cancer Prevention and Screening, National Cancer Center, Tokyo, Japan; and the <sup>3</sup>Department of Biostatistic, Epidemi-

ology and Preventive Health Sciences, University of Tokyo, Tokyo, Japan.

Address correspondence to Nobuhiro Yamada, MD, PhD, Department of Internal Medicine, University of Tsukuba Institute of Clinical Medicine, 1-1-1 Tennodai, Tsukuba, Ibaraki, Japan 305-8575. E-mail: jdcstudy@md.tsukuba.ac.jp.

DOI: 10.2337/dc06-0329

© 2006 by the American Diabetes Association.

## References

1. Oda E: Cut points of waist circumference (Letter). *Diabetes Care* 29:1188–1189, 2006
2. Sone H, Tanaka S, Ishibashi S, Yamasaki Y, Oikawa S, Ito H, Saito Y, Ohashi Y, Akanuma Y, Yamada N, the Japan Diabetes Complications Study (JDCS) Group: The new worldwide definition of metabolic syndrome is not a better diagnostic predictor of cardiovascular disease in Japanese diabetic patients than the existing definitions: additional analysis from the Japan Diabetes Complications Study. *Diabetes Care* 29:145–147, 2006
3. Sone H, Mizuno S, Fujii H, Yoshimura Y, Yamasaki Y, Ishibashi S, Katayama S, Saito Y, Ito H, Ohashi Y, Akanuma Y, Yamada N, the Japan Diabetes Complications Study: Is the diagnosis of metabolic syndrome useful for predicting cardiovascular disease in Asian diabetic patients? Analysis from the Japan Diabetes Complications Study. *Diabetes Care* 28:1463–1471, 2005
4. Examination Committee of Criteria for “Obesity Disease” in Japan, Japan Society for the Study of Obesity: new criteria for “obesity disease” in Japan. *Circ J* 66:987–992, 2002
5. Alberti KG, Zimmet P, Shaw J, the IDF Epidemiology Task Force Consensus Group: The metabolic syndrome: a new worldwide definition. *Lancet* 366:1059–1062, 2005
6. Grundy SM, Cleeman JI, Daniels SR, Donato KA, Eckel RH, Franklin BA, Gordon DJ, Krauss RM, Savage PJ, Smith SC Jr, Spertus JA, Costa F, the American Heart Association, the National Heart, Lung, and Blood Institute: Diagnosis and management of the metabolic syndrome: an American Heart Association/National Heart, Lung, and Blood Institute Scientific Statement. *Circulation* 112:2735–2752, 2005
7. World Health Organization (WHO)/International Association of the Study of Obesity (IASO)/the International Obesity Task Force (IOTF): The Asia-Pacific perspective: redefining obesity and its treatment [article online], 2000. Available from [http://www.diabetes.com.au/pdf/obesity\\_report.pdf](http://www.diabetes.com.au/pdf/obesity_report.pdf). Accessed 1 February 2006
